# Supplementary material for: ADAR-mediated RNA editing of DNA:RNA hybrids is required for DNA double strand break repair
Source: PubMed Central journal article supplement (PMC8448848; doi:10.1038/s41467-021-25790-2), 2021-09-17
Supplement: 41467_2021_25790_MOESM2_ESM.pdf [file 41467_2021_25790_MOESM2_ESM.pdf]

## **Description of Additional Supplementary Files**

File Name: Supplementary Data 1

Description: Recoding index changes upon irradiation. A list of all genes which recoding index significantly changes upon irradiation, with the percentage of recoding in non-irradiated samples and irradiated samples.
